# Supplementary material for: Effectiveness Evaluation of a UVC-Photoinactivator against Selected ESKAPE-E Pathogens
Source: Preprints.org preprint supplement (doi:10.20944/preprints202211.0114.v1), 2022-11-07
Supplement: Supplementary file 1 [file supplementary]

# Effectiveness Evaluation of a UVC-Photoinactivator against Selected ESKAPE-E Pathogens

**Karyne Rangel <sup>1,2,\*</sup>, Fellipe O. Cabral <sup>3</sup>, Guilherme C. Lechuga <sup>1,2</sup>, Maria H.S. Villas-Bôas<sup>4</sup>, Victor Midlej <sup>5</sup> and Salvatore G. De-Simone <sup>1,2,6</sup>,**

- <sup>1</sup> Center for Technological Development in Health (CDTS)/National Institute of Science and Technology for Innovation in Neglected Population Diseases (INCT-IDPN), FIOCRUZ, Rio de Janeiro 21040-900, RJ, Brazil.
- <sup>2</sup> Laboratory of Epidemiology and Molecular Systematics (LESM), Oswaldo Cruz Institute, FIOCRUZ, Rio de Janeiro 21040-900, RJ, Brazil.
- <sup>3</sup> Laboratory of Diphtheria and Corynebacteria of Clinical Importance, Faculty of Medical Sciences, State University of Rio de Janeiro (UERJ), Rio de Janeiro 20550-900, RJ, Brazil.
- <sup>4</sup> Microbiology Department, National Institute for Quality Control in Health (INCQS), FIOCRUZ, Rio de Janeiro 21040-900, RJ, Brazil.
- <sup>5</sup> Structural Biology Laboratory (LBE), Oswaldo Cruz Institute, FIOCRUZ, Rio de Janeiro 21040-900, RJ, Brazil.
- <sup>6</sup> Post-Graduation Program in Science and Biotechnology, Department of Molecular and Cellular Biology, Biology Institute, Federal Fluminense University (UFF), Niterói 22040-036, RJ, Brazil.

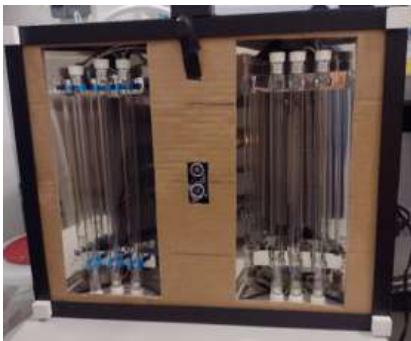

**Figure S1.** Front view of the upper platform of the Sanitech UVC shoe sole decontaminator equipment.

|   | 1  | 2  | 3  | 4  | 5  | 6  | 7 | 8 | 9 | 10  | 11 | 12 |
|---|----|----|----|----|----|----|---|---|---|-----|----|----|
| A |    |    |    |    |    |    |   |   |   |     |    |    |
| B | Sa | Pa | Se | Ec | Ab | Ef |   |   |   | PBS |    | LB |
| C |    |    |    |    |    |    |   |   |   |     |    |    |
| D |    |    |    |    |    |    |   |   |   |     |    |    |
| E |    |    |    |    |    |    |   |   |   |     |    |    |
| F |    |    |    |    |    |    |   |   |   |     |    |    |
| G |    |    |    |    |    |    |   |   |   |     |    |    |
| H |    |    |    |    |    |    |   |   |   |     |    |    |

**Figure S2.** Arrangement of ATCC bacterial strains in the microplate for exposure to the UVC system and control group (no treatment). Abbreviations: Sa, *S. aureus* (ATCC 6538); Pa, *P. aeruginosa* (ATCC 15442); Se, *S. enterica* (ATCC 10708); Ec, *E. coli* (ATCC 25922); Ab, *A. baumannii* (ATCC 19606); Ef, *E. faecalis* (ATCC 29212); PBS, sterile phosphate buffered saline; L, Luria Bertani broth.
